# Supplementary material for: Submicron-sized mesoporous anatase TiO2 beads with a high specific surface synthesized by controlling reaction conditions for high-performance Li-batteries
Source: Royal Society of Chemistry journal article supplement (doi:10.1039/c3ra41942h), 2013-01-01
Supplement: c3ra41942h.pdf [file c3ra41942h.pdf]

## Supporting Information

### Submicron-size mesoporous anatase TiO<sub>2</sub> beads with high specific surface synthesized by controlling reaction conditions for high-performance Li-batteries

Kunlei Zhu, Jianhua Tian, Yiping Liu, Na Lin, Qiwei Tang, Xiangmei Yu, Yingming Zhu and Zhongqiang Shan\*

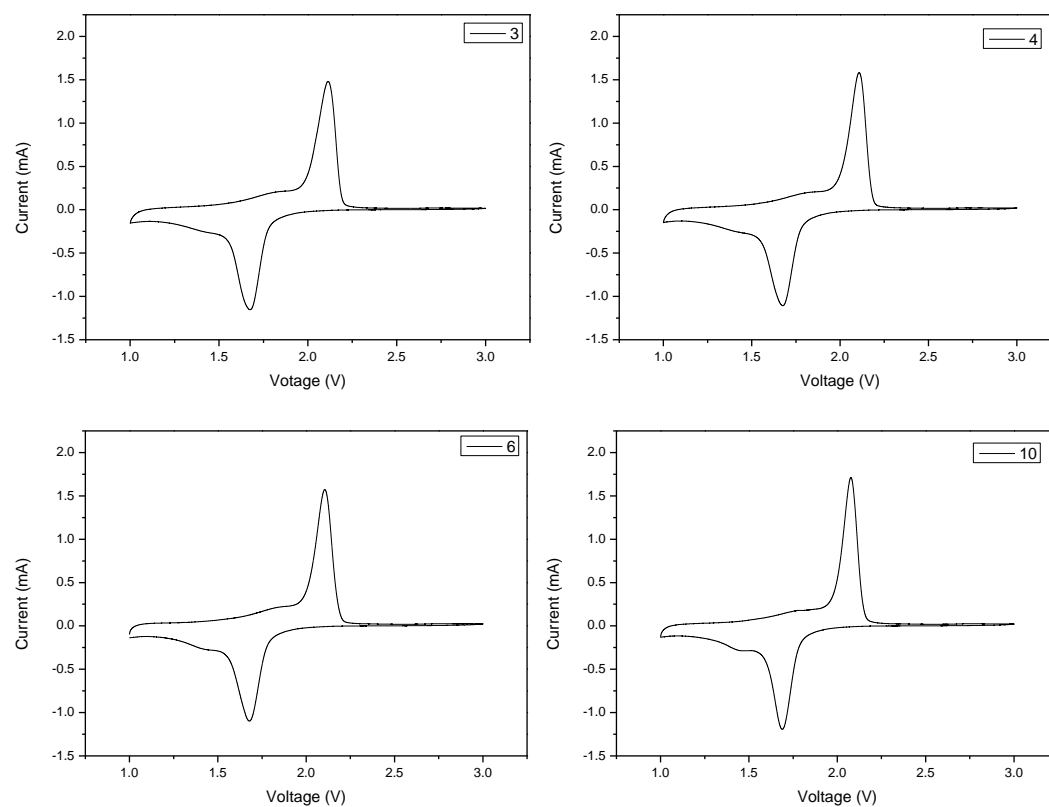

**Fig.S1** The cyclic voltammetry (CV) curve of the SMATBs at a scan speed of 1 mV s<sup>-1</sup> for the third, fourth, sixth, and tenth cycles.

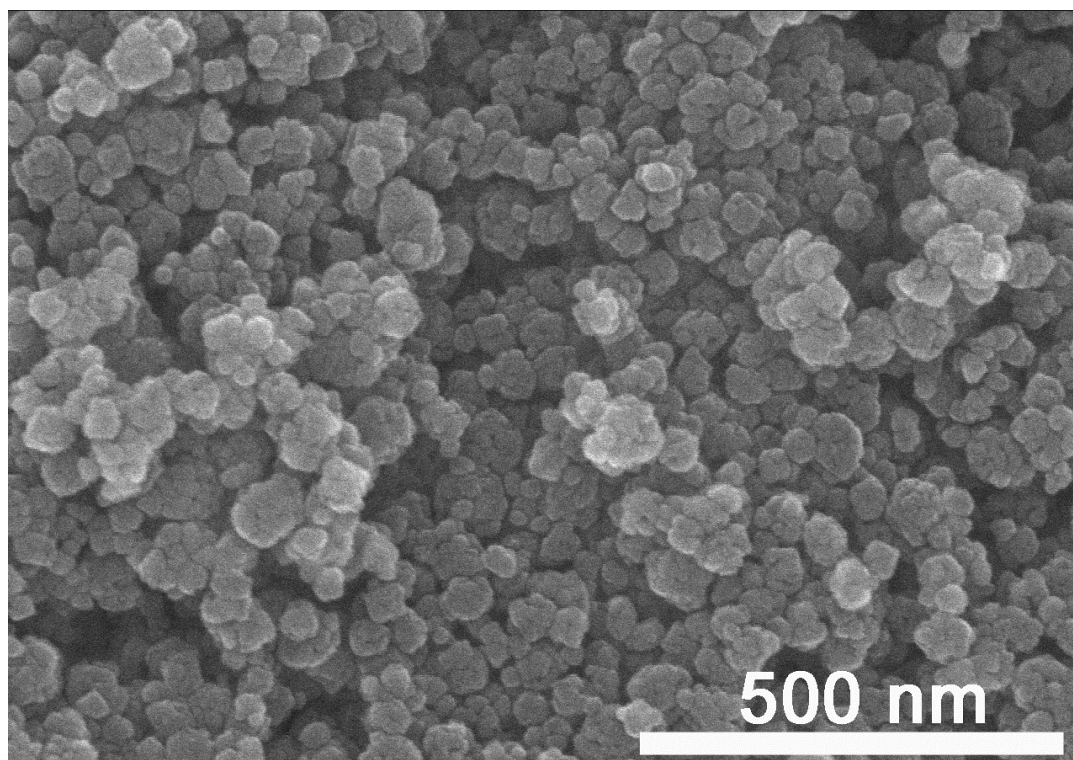

**Fig.S2** SEM image of TiO<sub>2</sub> nanoparticles, the size is ~ 25 nm.

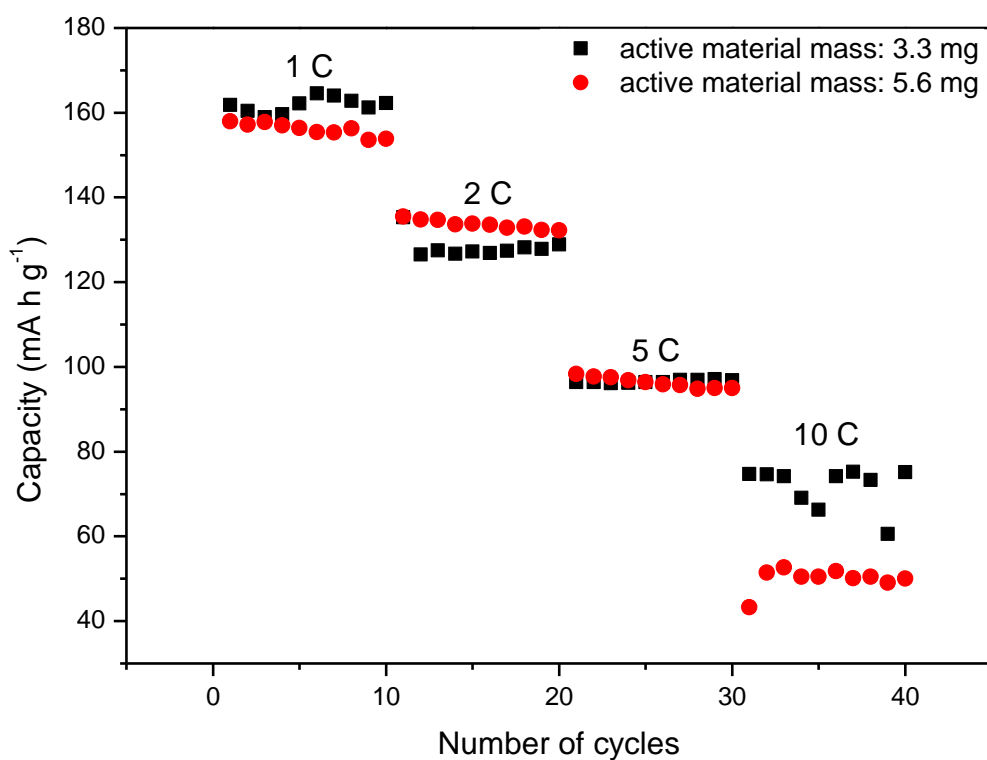

**Fig.S3** The specific capacities of the SMATBs electrodes with different active material mass at various charge-discharge rates.

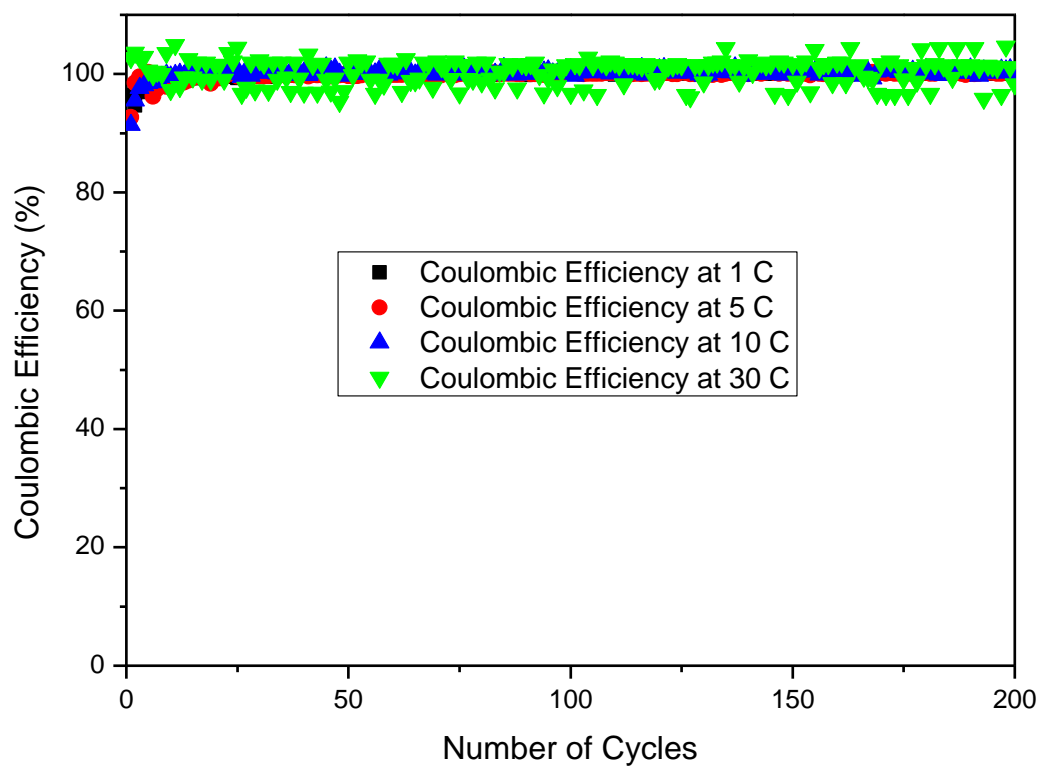

**Fig.S4** Coulombic Efficiency curves for SMTABs electrodes at 1, 5, 10 and 30 C charge-discharge rate, respectively.

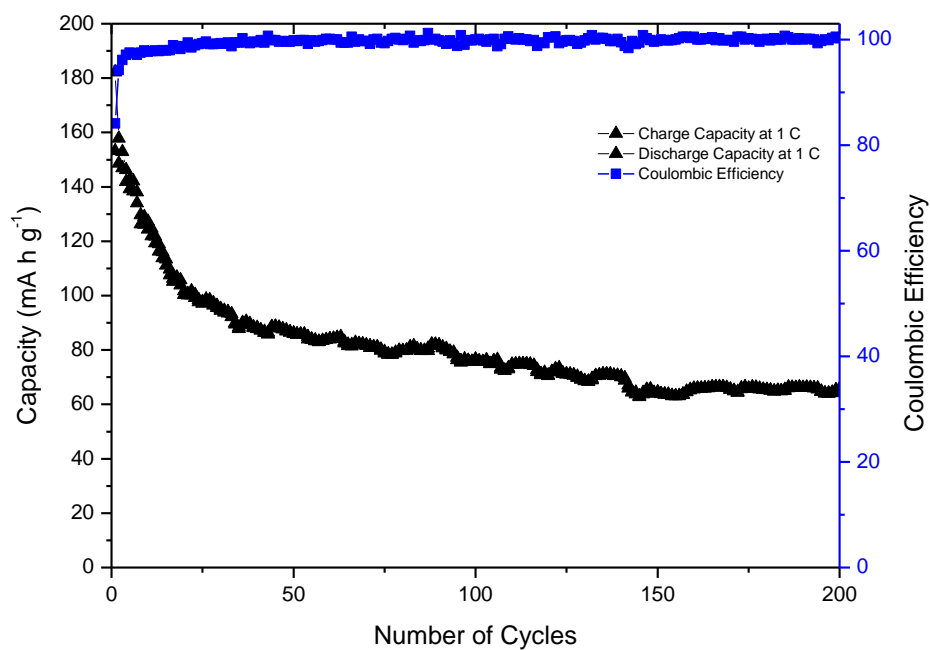

**Fig.S5** Cycling performance of TiO<sub>2</sub> nanoparticles up to 200 cycles at 1 C charge-discharge rate.
